# Supplementary material for: Misfit of Complete Maxillary Dentures’ Posterior Palatal Seal following Polymerisation with Four Different Autopolymerising Resins: An In Vitro Study
Source: MDPI journal article supplement (doi:10.3390/ma15155285), 2022-07-30
Supplement: s1 [file s1]

Information on the resins used

| Product     | PalaXpress® by Heraeus Kulzer                                                                                                                                                                             | Aesthetic Autopolymerisat® by Candulor                                                                                                                                                                               | ProBase® Cold by Ivoclar Vivadent                                                                                                                                                                                    | FuturaGen® by Schütz Dental                                                   |
|-------------|-----------------------------------------------------------------------------------------------------------------------------------------------------------------------------------------------------------|----------------------------------------------------------------------------------------------------------------------------------------------------------------------------------------------------------------------|----------------------------------------------------------------------------------------------------------------------------------------------------------------------------------------------------------------------|-------------------------------------------------------------------------------|
| Description | Universal dental base material for dentures for injection and pouring                                                                                                                                     | Cold-curing resin for the pouring and packing technique                                                                                                                                                              | Cold-curing resin for the pouring and packing technique                                                                                                                                                              | Universal denture base material for injection procedures or pouring technique |
| Composition | <p><u>cold-curing polymer</u></p> <p><b>Powder main component:</b></p> <p>Methyl methacrylate copolymer</p> <p><b>Liquid main components:</b></p> <p>Methyl methacrylate, dimethacrylate cold polymer</p> | <p><u>cold-curing polymer</u></p> <p><b>Powder:</b></p> <p>Polymethyl methacrylate, plasticizer, benzoyl peroxide, catalyst, pigments</p> <p><b>Liquid:</b></p> <p>Methyl methacrylate, dimethacrylate, catalyst</p> | <p><u>cold-curing polymer</u></p> <p><b>Powder:</b></p> <p>Polymethyl methacrylate, plasticizer, benzoyl peroxide, catalyst, pigments</p> <p><b>Liquid:</b></p> <p>Methyl methacrylate, dimethacrylate, catalyst</p> | MMA-based cold-curing resin                                                   |

| Application in the pouring technique:      |                                                              |                                                                                                       |                                                                                                       |                                     |
|--------------------------------------------|--------------------------------------------------------------|-------------------------------------------------------------------------------------------------------|-------------------------------------------------------------------------------------------------------|-------------------------------------|
| <b>Cast</b>                                | Isolate                                                      | hand-warm, well-watered plaster surfaces, isolate                                                     | well-watered plaster surfaces, isolate                                                                | 30°C to 40°C, isolate               |
| <b>Mixing ratio</b>                        | 10 g powder: 7 mL liquid                                     | 15 g polymer: 10 mL monomer                                                                           | 15 g powder: 10 mL monomer                                                                            | up to a ratio of 10: 7 free mixable |
| <b>Mixing time</b>                         | 15 s                                                         | 20-30 s, Let stand for 15 s                                                                           | Mix well, let stand for 15 s                                                                          | 1 min                               |
| <b>Processing time at room temperature</b> | 3 min pourable, after 4 min plastic phase from approx. 7 min | flow phase approx. 2.5-3 min, after transition phase from approx. 4 min solid, further 3 min moldable | flow phase approx. 2.5-3 min, after transition phase from approx. 4 min solid, further 3 min moldable | Mixing time 1 min                   |
| <b>Polymerization time</b>                 | 30 min                                                       | 15 min                                                                                                | 15 min                                                                                                | 15 min                              |
| <b>Water temperature</b>                   | 55°C                                                         | 40 °C                                                                                                 | 40 °C                                                                                                 | 45°C                                |
| <b>Pressure</b>                            | 2 bar                                                        | 2 bar                                                                                                 | 2–6 bar                                                                                               | 2-4 bar                             |
